# Supplementary material
Source: publisher figshare collection journal article supplement (https://karger.figshare.com/ndownloader/files/40870754)
Supplement: Supplementary file 1 [file 40870754]

Supplementary Table S2. Causes of death

| Causes of death | Total  n=387 | Group 1  n=117 | Group 2  n=158 | Group 3  n=112 | p |
| --- | --- | --- | --- | --- | --- |
| Infectious % | 60.7 | 65.6 | 64.4 | 54.2 |  |
| Cardiovascular % | 23.3 | 18.8 | 20.3 | 28.8 | 0.875 |
| Neoplastic % | 10 | 9.4 | 8.5 | 11.9 |  |
| Others % | 6 | 6.3 | 6.8 | 5.1 |  |
